# Supplementary material for: Extracellular HMGB1 promotes CD44 expression in hepatocellular carcinoma via regulating miR-21
Source: publisher site journal article supplement (doi:10.18632/aging.202649), 2021-03-04
Supplement: Supplementary file [file aging-v13i6-202649-supplementary-material-SD1.pdf]

## SUPPLEMENTARY FIGURES

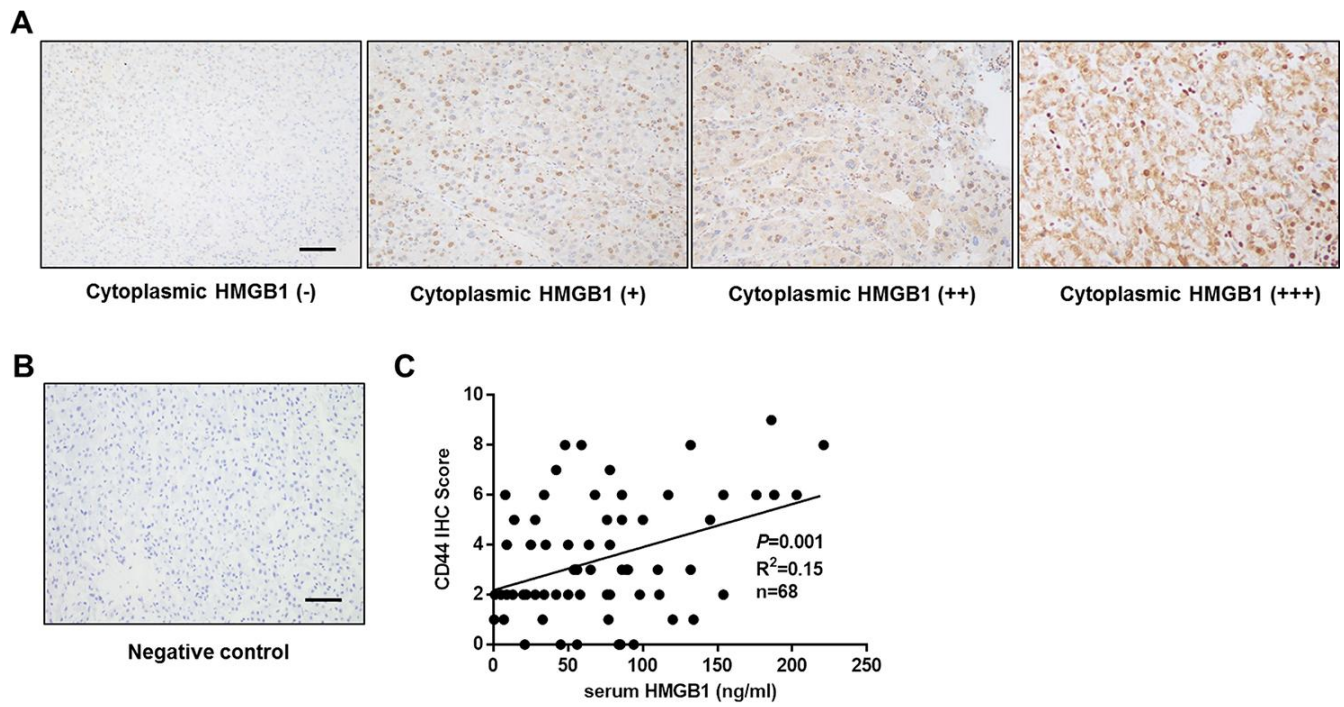

**Supplementary Figure 1. Extracellular HMGB1 is correlated with CD44 in HCC.** (A) Representative images show different intensities of staining cytoplasmic HMGB1 in HCC samples. Scale bars, 100 $\mu$ m. (B) The negative control image is taken from an identical assay without primary antibody. (C) Positive correlation between serum HMGB1 and CD44 IHC score.

**A**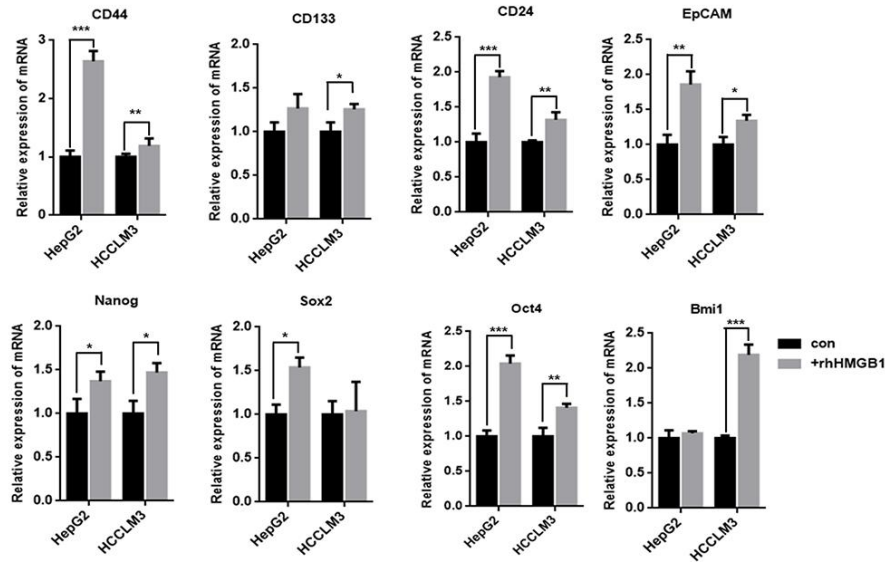**B**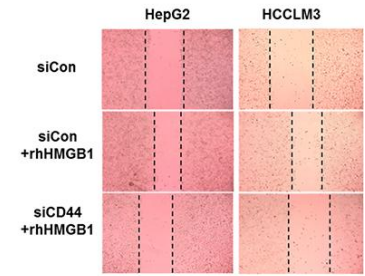

**Supplementary Figure 2. Extracellular HMGB1 promotes CSCs formation.** (A) Q-PCR analysis shows that rhHMGB1 increases the expression of CSCs markers. HepG2 and HCCLM3 cells were cultured with rhHMGB1 (1 $\mu$ g/ml) for 24h. (B) Wound healing experiments were performed and results indicate rhHMGB1 promotes the migration of HCC in CD44-dependent way. HepG2 and HCCLM3 cells were transfected with negative siRNA or CD44 siRNA and then cultured with rhHMGB1 (1 $\mu$ g/ml) for 24h. Data are means  $\pm$  SEM, \* means  $p<0.05$ , \*\* means  $p<0.01$ , \*\*\* means  $p<0.001$  by unpaired student T test.

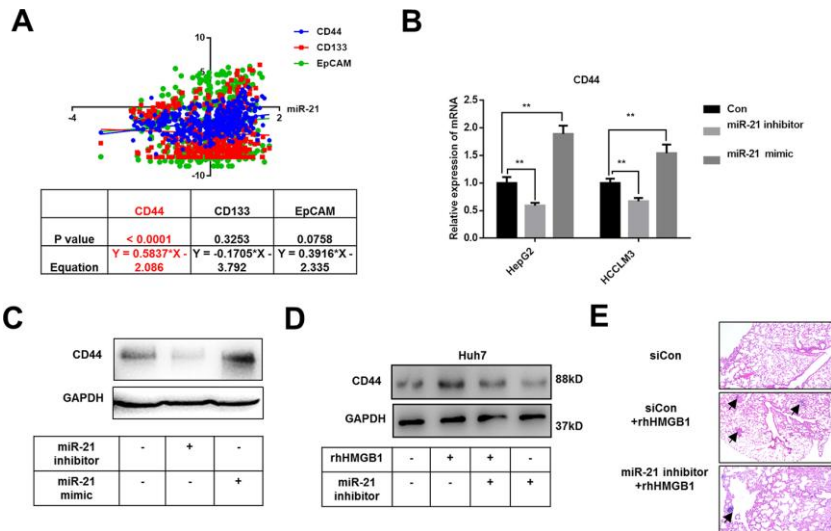

**Supplementary Figure 3. miR-21 increases CD44 expression in HCC.** (A) miR-21 is positively associated with CD44 expression. Data were extracted from TCGA database (<http://xena.ucsc.edu/>). (B) Q-PCR analysis shows miR-21 increases CD44 expression. HepG2 and HCCLM3 were transfected with miR-21 mimic or inhibitor respectively. (C) Immunoblot analysis indicates that miR-21 upregulates CD44 expression. (D) Immunoblot analysis shows that miR-21 inhibitor represses CD44 expression caused by rhHMGB1. Huh7 cells were transfected with negative control or miR-21 inhibitor and then cultured with rhHMGB1 (1 $\mu$ g/ml) for 24h. (E) Results from metastasis model *in vivo* show that miR-21 inhibitor represses lung metastasis caused by rhHMGB1. HepG2 cells were transfected with negative control or miR-21 inhibitor and then cultured with rhHMGB1 (1 $\mu$ g/ml) for 24h. Data are means  $\pm$  SEM, \* means  $p<0.05$ , \*\* means  $p<0.01$ , \*\*\* means  $p<0.001$  by unpaired student T test.

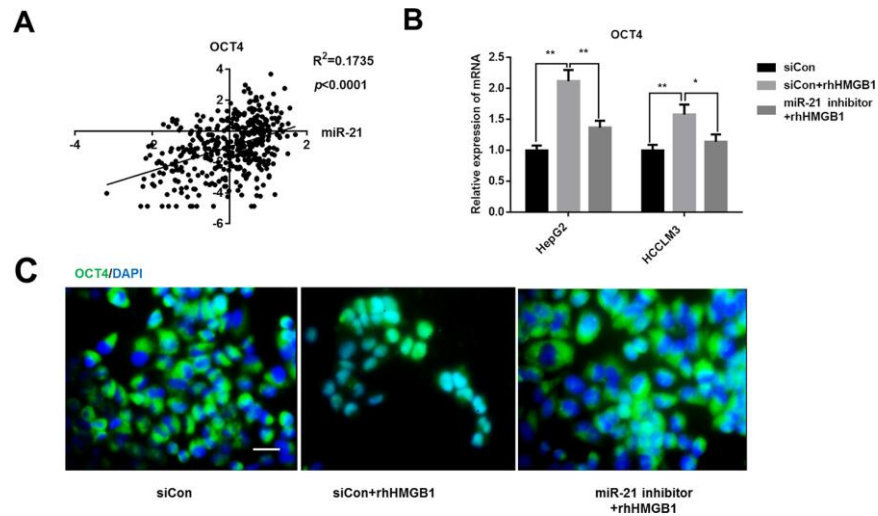

**Supplementary Figure 4. miR-21 is essential for extracellular HMGB1-mediated OCT4 expression.** (A) miR-21 is positively associated with OCT4 expression. Data were extracted from TCGA database (<http://xena.ucsc.edu/>). (B) Q-PCR analysis shows miR-21 inhibitor decreases OCT4 expression caused by rhHMGB1. HepG2 and HCCLM3 cells were transfected with negative control or miR-21 inhibitor and then cultured with rhHMGB1 (1 $\mu$ g/ml) for 24h. (C) Results from immunofluorescences staining OCT4 reveal that miR-21 inhibitor restricts OCT4 nuclear translocation caused by rhHMGB1. HepG2 cells were transfected with negative control or miR-21 inhibitor and then cultured with rhHMGB1 (1 $\mu$ g/ml) for 24h. Data are means  $\pm$  SEM, \* means  $p<0.05$ , \*\* means  $p<0.01$ , \*\*\* means  $p<0.001$  by unpaired student T test.

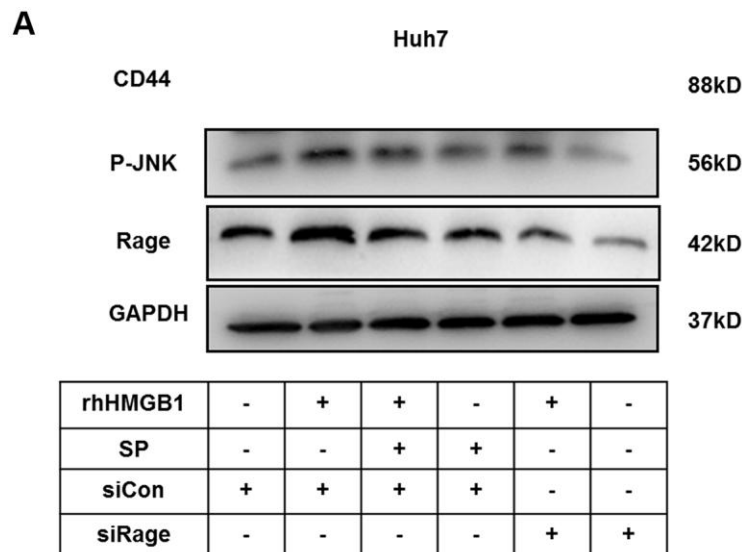

**Supplementary Figure 5. Extracellular HMGB1 upregulates CD44 expression via activating miR-21/Rage/JNK signaling in Huh7 cells.** (A) Immunoblot analysis indicates rhHMGB1 promotes CD44 expression by activating Rage/JNK signaling pathway. Huh7 cells were treated with negative control, Rage siRNA, JNK inhibitor(SP600125,SP,20 $\mu$ m) and rhHMGB1 (1 $\mu$ g/ml) for 24h.
